## **A genetic variant protective against severe COVID-19 is inherited from Neandertals**

### **Authors**

Hugo Zeberg<sup>1,2\*</sup> and Svante Pääbo<sup>1,3\*</sup>

### **Affiliations**

<sup>1</sup> Max Planck Institute for Evolutionary Anthropology, Deutscher Platz 6, D-04103 Leipzig, Germany.

<sup>2</sup> Department of Neuroscience, Karolinska Institutet, SE-17177 Stockholm, Sweden.

<sup>3</sup> Okinawa Institute of Science and Technology, Onna-son, Okinawa 904-0495, Japan.

**\*Corresponding authors:** [hugo.zeberg@ki.se](mailto:hugo.zeberg@ki.se), [paabo@eva.mpg.de](mailto:paabo@eva.mpg.de)

The authors have withdrawn their manuscript since the data used in the manuscript was incomplete. It incorrectly used data from the COVID-19 HGI round 4 (alpha) release rather than data presented in the preprint from the GenOMICC consortium (doi:10.1101/2020.09.24.20200048). Therefore, the authors do not wish this work to be cited as reference for the project. If you have any questions, please contact the corresponding author.
